# Supplementary material
Source: PubMed Central journal article supplement (PMC5770186)
Supplement: NIHMS899309-supplement-1.pdf [file NIHMS899309-supplement-1.pdf]

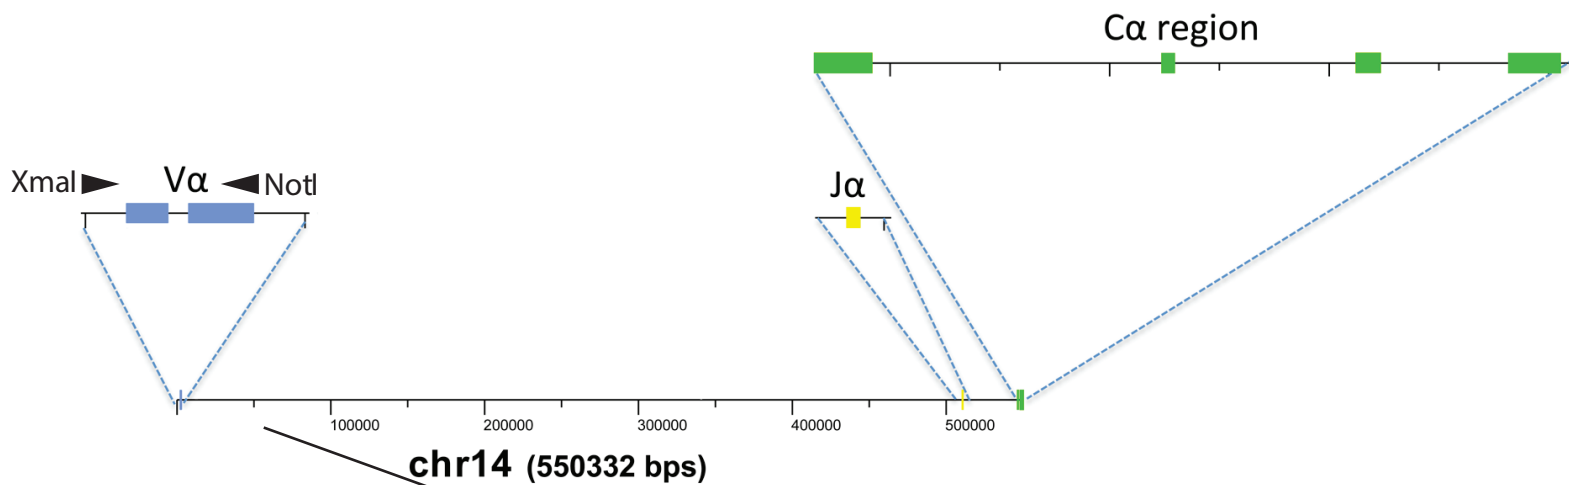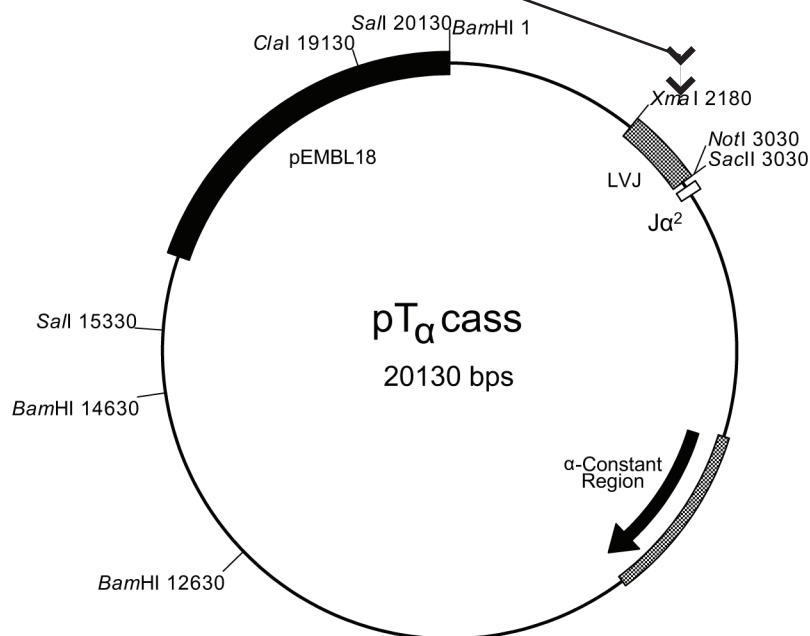

#### V alpha6 genomic DNA

```

GCGGCCGCAGTGCTAGGAAGGGCGGCCTGGACATCCCAGCCAAAGCTGGGAATTTATAG
AAAACACCTTTTCAAATTGCTTCACTGTCTCAGAACTTACTTGGTAATACTTGTAACTGGTC
CCTGTTCCAAAGACGACTTTGTTGGTATTGGAAACGCTCACAGCACAGAAGTACACAGCC
GAGTCGCTCCAGTGCACAGAGGCTTCCGCAGGTGGAAGGAAGAGTTACTCTTGATGAA
CTCAGCCTCAAAGCCATTCCTTGAACCACTGGGTCTCCGGAATAGTACTTGAGGAG
CAGCTGCAGCCCCTGCCGCGGGTACTGGACATAACCAGAACAGATAAGGCGTCCCAGAGTA
GGAATACTTGCATCTCAGCTGCAGAGAGGCTCCTTCAGAGACAGTGACGCGAGCATCGGG
CTGTGTCACTGACTGAGCTTGGGCATCTCCTGCAAAGGAATATTAGGTCAGGAACTGTAGT
GCAGACTTCACTGAGGACAGTCAGGATCCGGGGATACAGAGACCACAAGAAAGCTGTACT
CACTCAGGACAAAGTGTATCCCCAGCACTGGGAGGAGTGCCAGGAGCATGGCTGAGCCT
TGGGAAGGCTGCAGCTCTGCCCGGG

```

Supplementary Figure 1: Construction of TCR alpha clone and genomic sequence.

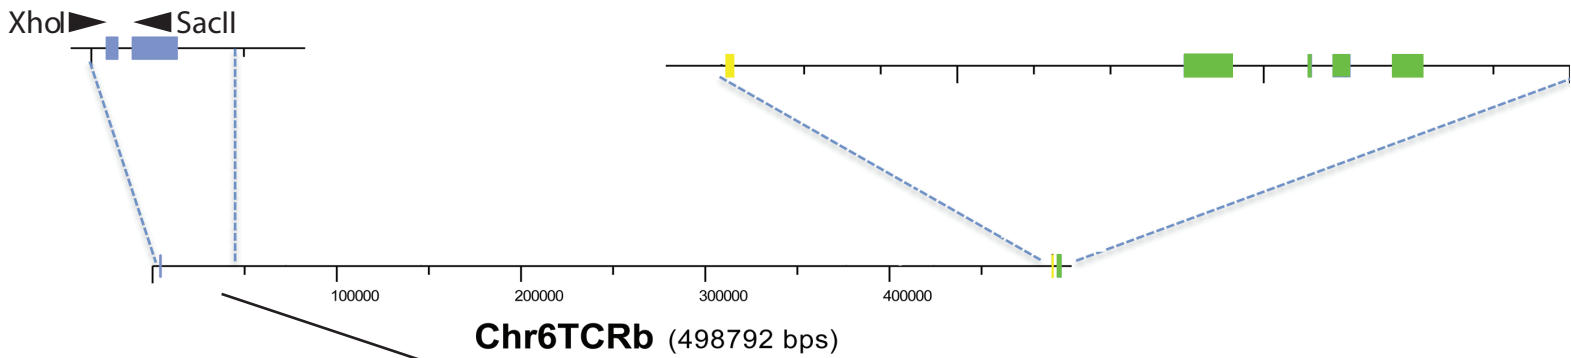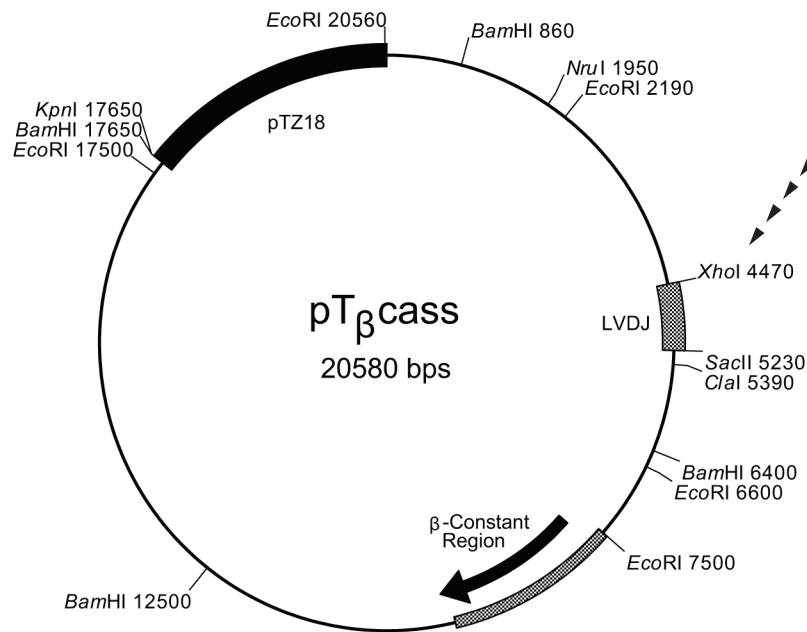

V beta 10 genomic DNA

```

CTCGAGCCTTGACCCAACACTATGGGCTGTAGGCTCCTAAGCTGTGTGGCCTTCTGCCTCTTGG
GAATAGGTGAGTAGTTGTGGTCCTAGGCCAGGAGATATGATTTTGTGGAGTCCTTTGAGAAT
GACTACTTCTGAAATGTTTCCGAATTATGATTATCTTTCACAGGCCCTTTGGAGACGGCTGTTT
TCCAGACTCCAAACTATCATGTCACACAGGTGGGAAATGAAGTGTCTTTCAATTGTAAGCAA
CTCTGGGCCACGATACTATGTATTGGTACAAGCAAGACTCTAAGAAATTGCTGAAGATTATGT
TTAGCTACAATAATAAGCAACTCATTGTAAACGAAACAGTTCCAAGGCGCTTCTCACCTCAGT
CTTCAGATAAAGCTCATTGGAATCTTCGAATCAAGTCTGTAGAGCCGGAGGACTCTGCTGTG
TATCTCTGTGCCAGCAGCCTCGACAGGGGATCCTATGAACAGTACTTCGGTCCCGGCACCA
GGCTCACGTTTTAGGTAAGATTCACATCTCTCGCTTCCACCCAATTCTGGGTCCCTGGA
GTAGTTTGGAGTAGACCAGCCGCGG

```

Supplementary Figure 2: Construction of TCR beta clone and genomic sequence.
